# Supplementary material for: Good Attitudes Are Not Good Enough: An Ethnographical Approach to Investigate Attitude-Behavior Inconsistencies in Sustainable Choice
Source: MDPI journal article supplement (doi:10.3390/foods10061317), 2021-06-08
Supplement: s1 [file s1]

## Supplementary material A

| Code                                     | Development                                      | Description                                                                                                                           | Main Theme                                                          |
|------------------------------------------|--------------------------------------------------|---------------------------------------------------------------------------------------------------------------------------------------|---------------------------------------------------------------------|
| <b>1 Basic Codes</b>                     | Inductive codes, developed during initial coding |                                                                                                                                       |                                                                     |
| <b>1.1 Food Perceptions and Behavior</b> | Inductive, developed during initial coding       | Food perception and food behavior                                                                                                     |                                                                     |
| Bad Worse                                | Inductive, developed during initial coding       | Evaluate/categorize food or food behavior as “bad” or worse compared to other food or food behavior                                   |                                                                     |
| Conflict                                 | Inductive, developed during initial coding       | Food or food behavior conflicts. E.g. within own behavior, with family members, with time management, with other food attributes etc. |                                                                     |
| DIY                                      | Inductive, developed during initial coding       | Homemade dishes, home grown food etc.                                                                                                 | Cue: self-made dishes are associated with health benefits           |
| Good Better                              | Inductive, developed during initial coding.      | Evaluate/categorize food or food behavior as “good” or better compared to other food or food behavior                                 |                                                                     |
| Habit                                    | Inductive, developed during initial coding       | Consumption habits and patterns. How they "normally" or "regularly" do things related to food and food behavior                       |                                                                     |
| Inconsistency                            | Inductive, developed during initial coding       | Inconsistencies and uncertainties in food choice and behavior                                                                         |                                                                     |
| Informal Information Narratives          | Inductive, developed during initial coding       | Unofficial information e.g. narratives from friends, news articles, social media, documentaries etc.                                  | Information about food comes from unofficial sources and narratives |
| Opinion                                  | Inductive, developed during initial coding       | Strong opinions concerning food and food behavior                                                                                     |                                                                     |
| Responsibility                           | Inductive, developed during initial coding       | Self- or consumers responsibility with respect to sustainable food behavior                                                           | Consumers feel responsible for sustainable food systems             |
| Short cuts                               | Inductive, developed during initial coding       | Mental short cuts for food evaluations and food choice behavior                                                                       |                                                                     |
| <b>1.2 Thematic Categories</b>           | Inductive and deductive, developed               | Food categories and themes                                                                                                            |                                                                     |

|                       |                                             |                                                                                                        |                                                                                                                                                                                                                    |
|-----------------------|---------------------------------------------|--------------------------------------------------------------------------------------------------------|--------------------------------------------------------------------------------------------------------------------------------------------------------------------------------------------------------------------|
|                       | during initial coding                       |                                                                                                        |                                                                                                                                                                                                                    |
| Dairy Eggs            | Inductive, developed during initial coding  | Food category: dairy and eggs.                                                                         |                                                                                                                                                                                                                    |
| Fair Trade            | Inductive, developed during initial coding  | Food category: fair trade products                                                                     | Cue: fair trade products are associated with benefits for farmers and the environment                                                                                                                              |
| Fruits Vegetables     | Inductive, developed during initial coding  | Food category: fruits and vegetables                                                                   |                                                                                                                                                                                                                    |
| Ingredients           | Inductive, developed during initial coding  | Food theme: ingredients                                                                                | Cue: the absence/ presence of certain food ingredients is associated with health benefits                                                                                                                          |
| Label                 | Deductive, developed during initial coding  | Food theme: food labels                                                                                |                                                                                                                                                                                                                    |
| <i>Organic Label</i>  | Deductive, developed during initial coding  | Food theme: organic labels (e.g. EU-organic, Demeter, organic retailer label etc.) or labeled products | German organic label is better known as EU organic. In general, there is a positive attitude towards organic labels. Organic Labels from farmer associations are perceived as being stricter and therefor “better” |
| <i>PGI_PDO</i>        | Deductive, developed during initial coding. | Food theme: PDO/PGI label or labeled products                                                          | PGI_PDO Label is not known, but appreciated                                                                                                                                                                        |
| <i>Private Label</i>  | Deductive, developed during initial coding  | Food theme: private labels or labeled products                                                         | Private and retailer label are well known and trusted.                                                                                                                                                             |
| <i>Regional Label</i> | Deductive, developed during initial coding  | Food theme: labels indicating the region of origin or about labeled products                           | Label indicating the region of origin are less known, but appreciated                                                                                                                                              |
| Meat                  | Inductive, developed during initial coding  | Food category: meat and meat products                                                                  | Cue: meat consumption is associated with health risks.<br>Meat consumption in general is perceived as bad.                                                                                                         |
| Media                 | Inductive, developed during initial coding  | Food theme: media coverage and information from media incl. social media                               | Media information is heavily relied on, but contradicting.                                                                                                                                                         |
| Organic               | Deductive, developed during initial coding  | Food theme: organic food in general. (Also includes every phrase coded                                 | Cue: organic food is associated with health and environmental benefits and                                                                                                                                         |

|                                          |                                                                       |                                                                                    |                                                                                                                                                                                |
|------------------------------------------|-----------------------------------------------------------------------|------------------------------------------------------------------------------------|--------------------------------------------------------------------------------------------------------------------------------------------------------------------------------|
|                                          |                                                                       | under the "Organic Label")                                                         | with higher animal welfare standards                                                                                                                                           |
| Pesticides and Antibiotics               | Inductive, developed during initial coding                            | Food theme: pesticides and antibiotics                                             | Cue: the absence of antibiotics in animal breeding and antibiotics in plant cultivation are associated with health and environmental benefits and with a better animal welfare |
| Price                                    | Inductive, developed during initial coding                            | Food theme: food prices                                                            |                                                                                                                                                                                |
| Processed Food                           | Inductive, developed during initial coding                            | Food theme: processed food products and ready to eat meals                         | Cue: consuming highly processed food is associated with health risks                                                                                                           |
| Public Procurement                       | Deductive, developed during initial coding                            | Food theme: public procurement e.g. school meals, canteens                         |                                                                                                                                                                                |
| Region of Origin & Country of Origin     | Inductive, developed during initial coding                            | Food theme: local and national food in general                                     | Cue: local food is associated with environmental and with social benefits                                                                                                      |
| Seasonal                                 | Inductive, developed during initial coding                            | Food theme: seasonal food in general                                               | Cue: consuming seasonal food is associated with social benefits and environmental benefits                                                                                     |
| Supermarket                              | Inductive, developed during initial coding                            | Food theme: supermarkets                                                           |                                                                                                                                                                                |
| <i>Conventional</i>                      | Inductive, developed during initial coding                            | Food theme: conventional supermarkets                                              | Conventional supermarkets and discounters are main grocery suppliers.                                                                                                          |
| <i>Organic</i>                           | Inductive, developed during initial coding                            | Food theme: organic supermarkets                                                   | Shopping at an organic market is associated with health benefits, with environmental benefits and provides a good feeling                                                      |
| <i>Specialty and Farmer Market</i>       | Inductive, developed during initial coding                            | Food theme: specialty markets and farmer markets                                   | Shopping at a farmer's market or food from small scale producers is associated with social benefits, health benefits, environmental benefits and provides a good feeling       |
| <b>2 Life Course and Influences FCPM</b> | Inductive and deductive, developed during initial coding and recoding | Food choice development over the life course and influences                        |                                                                                                                                                                                |
| Life Course                              | Deductive, developed during initial coding and recoding               | Life course developments and experiences and its influence on food choice behavior | The life course forms food trajectories. Those affect the awareness and importance one attaches to suitability                                                                 |

|                            |                                                         |                                                                                                      |                                                                                                                                                                                                                                                                                                                                                     |
|----------------------------|---------------------------------------------------------|------------------------------------------------------------------------------------------------------|-----------------------------------------------------------------------------------------------------------------------------------------------------------------------------------------------------------------------------------------------------------------------------------------------------------------------------------------------------|
|                            |                                                         |                                                                                                      | of food-related issues as an adult. It can foster or impede sustainable food choice behavior                                                                                                                                                                                                                                                        |
| Food Context Point of Sale | Deductive, developed during initial coding and recoding | Influence of food context and especially point of sale on food choice behavior                       | The food context within the immediate neighborhood contributes to the perceived “lack of availability” of sustainable food products. Due to a low distribution of appropriate retailers in the immediate neighbourhood participants shop at conventional supermarkets and discounters. The food context can impede sustainable food choice behavior |
| Ideals                     | Deductive, developed during initial coding and recoding | Influence of personal ideals on food choice behavior                                                 | A positive attitude towards sustainable food products and behavioural intentions are strongly influenced by ideals and societal expectations. Ideals can foster sustainable food choice behavior                                                                                                                                                    |
| Personal Factors           | Deductive, developed during initial coding and recoding | Influence of personal factors like food preferences and boundaries and roles on food choice behavior | Personal food boundaries and internalized roles are hard to overcome. They can impede or foster sustainable food choice behavior                                                                                                                                                                                                                    |
| Resources                  | Deductive, developed during initial coding and recoding |                                                                                                      | Sufficient resources are necessary to successfully implement a sustainable diet                                                                                                                                                                                                                                                                     |
| <i>Equipment</i>           | Deductive, developed during initial coding and recoding | Influence of material resources e.g. cooking equipment on food choice behavior                       | An adequate cooking equipment can foster sustainable food choice behavior                                                                                                                                                                                                                                                                           |
| <i>Financial</i>           | Deductive, developed during initial coding and recoding | Influence of financial resources and financial status on food choice behavior                        | Sufficient financial resources are a precondition for sustainable food choice behavior                                                                                                                                                                                                                                                              |
| <i>Knowledge</i>           | Deductive, developed during initial coding and recoding | Influence of knowledge of sustainability and food on food choice behavior                            | A lack of knowledge or the inability to determine the reliability and usefulness of information can impede sustainable                                                                                                                                                                                                                              |

|                           |                                                                                                                                                                                |                                                               |                                                                                                                                                                                                                               |
|---------------------------|--------------------------------------------------------------------------------------------------------------------------------------------------------------------------------|---------------------------------------------------------------|-------------------------------------------------------------------------------------------------------------------------------------------------------------------------------------------------------------------------------|
|                           |                                                                                                                                                                                |                                                               | food choice behavior                                                                                                                                                                                                          |
| <i>Skills</i>             | Deductive, developed during initial coding and recoding                                                                                                                        | Influence of skills on food choice behavior                   | Cooking skills can foster sustainable food choice behavior                                                                                                                                                                    |
| <i>Time</i>               | Inductive, developed during initial coding and recoding                                                                                                                        | Influence of the availability of time on food choice behavior | A lack of time can impede sustainable food choice behavior                                                                                                                                                                    |
| Social Factors            | Deductive, developed during initial coding and recoding                                                                                                                        | Influence of social Factors on food choice behavior           | The social system and relationships the household is embedded in can foster or impede sustainable food choice behavior                                                                                                        |
| <b>3 Food Values FCPM</b> | Inductive and deductive, developed during initial coding and recoding                                                                                                          | Contrasting diverse food values                               |                                                                                                                                                                                                                               |
| Animal Welfare            | Inductive, developed during initial coding and recoding                                                                                                                        | Animal welfare and animal health in food production           | Cue: organic food is associated with higher animal welfare standards. The value is a driver for attitudes and behavioral intentions.                                                                                          |
| Convenience               | Deductive and inductive, developed during initial coding and recoding. Includes convenience of product preparation (deductive) and convenience of product shopping (inductive) | Convenience of food preparation and food shopping             | Convenience while shopping for products is more important than convenience while preparing food. The value can compete with sustainability values                                                                             |
| Cost                      | Deductive, developed during initial coding and recoding                                                                                                                        | Cost of food products                                         | Though prices of a single sustainable product are rejected as competing value, participants admit that exclusively shopping for sustainable products would be too expensive. The value can compete with sustainability values |
| Environmental Protection  | Inductive, developed during initial coding and recoding.                                                                                                                       | Environmentally friendly food production.                     | Environmental protection is a driver for attitudes and behavioral intentions                                                                                                                                                  |
| <i>Cultivation</i>        | Inductive, developed during recoding                                                                                                                                           | Environmental protection though cultivation methods           | Cue: organic production methods and small-scale retailers/ producers are associated with eco-friendly cultivation methods                                                                                                     |
| <i>Packaging Waste</i>    | Inductive, developed during recoding                                                                                                                                           | Environmental protection though                               | Cue: plastic packaging is perceived as                                                                                                                                                                                        |

|                          |                                                         |                                                                                        |                                                                                                                                                                                                                                                                         |
|--------------------------|---------------------------------------------------------|----------------------------------------------------------------------------------------|-------------------------------------------------------------------------------------------------------------------------------------------------------------------------------------------------------------------------------------------------------------------------|
|                          |                                                         | avoidance of packaging and especially plastic waste                                    | being harmful for the environment                                                                                                                                                                                                                                       |
| <i>Transport</i>         | Inductive, developed during recoding                    | Environmental protection though short transport distances                              | Cue: long transport distances are perceived as being harmful for the environment                                                                                                                                                                                        |
| <i>Waste</i>             | Inductive, developed during recoding                    | Environmental protection though the avoidance food waste                               | Cue: food waste is perceived as being harmful for the environment                                                                                                                                                                                                       |
| Health                   | Deductive, developed during initial coding and recoding | Healthiness of food products                                                           | Cue: organic food, unprocessed food, unpacked food, food from small scale producers /retailers, the absent of certain ingredients and a diet without certain products is associated with health benefits. The value is a driver for attitudes and behavioral intentions |
| Managing Relationship    | Deductive, developed during initial coding and recoding | Relationships issues, balancing varying preferences, keeping the harmony               | Satisfying the needs of all family members and balancing varying preferences is crucial for a harmonic family life. The value can compete with sustainability values                                                                                                    |
| Sensory Perception       | Deductive, developed during initial coding and recoding |                                                                                        | Sensory perceptions can compete with sustainability values                                                                                                                                                                                                              |
| <i>Other</i>             | Deductive, developed during initial coding and recoding | Sensory perceptions like appearance and shelf life of food products                    | Shelf live, smell and appearance can compete with sustainability values                                                                                                                                                                                                 |
| <i>Taste</i>             | Deductive, developed during initial coding and recoding | Taste of food products                                                                 | Taste is an exclusionary value. If products are not tasty, they are nor bought. Other values cannot compensate the value taste                                                                                                                                          |
| Social Responsibility    | Deductive, developed during initial coding and recoding | Social responsibilities for local community/famers/shop owners in food choice behavior | Local food, food from small scale producers and retailers like farmer markets and specialty shops as well as fair trade products are associated with social benefits. The value is a driver for attitudes and behavioral intentions                                     |
| <b>4 Strategies FCPM</b> | Deductive, developed during initial coding and recoding | Food Choice Strategies                                                                 |                                                                                                                                                                                                                                                                         |

|                              |                                                          |                                                                         |                                                                                                                                                         |
|------------------------------|----------------------------------------------------------|-------------------------------------------------------------------------|---------------------------------------------------------------------------------------------------------------------------------------------------------|
| Assortment                   | Inductive, developed during initial coding               | Assortment strategies                                                   | Using the retailer's assortment and product arrangement to facilitate (sustainable) food choice                                                         |
| Passing by                   | Inductive, developed during initial coding               | Passing by strategy in food choice                                      | Visiting those retailers that are close to their place of residence or on their way to/from work/school to facilitate food choice                       |
| Choice Architecture          | Inductive, developed recoding                            | Role of the choice architecture in food choice                          | Changing the default choice architecture can facilitate (sustainable) food choice.                                                                      |
| Price                        | Inductive, developed during initial coding and recoding  | Price strategy in food choice                                           | Using food prices to facilitate food choice and food evaluations at supermarket                                                                         |
| Avoid Limit Substitute       | Inductive, developed during initial coding               | Avoidance, limitation and substitution                                  | Participants avoid, limit and substitute certain food products to facilitate (sustainable) choice                                                       |
| Satisficing                  | Inductive, developed during recoding                     | Opting for a satisfactory product                                       | Products must not be optimal in terms of perceived sustainability, satisfaction is sufficient.                                                          |
| Simplifications              | Inductive, developed during initial coding and recoding. | Simplification and Mental Short Cuts                                    | Usage of simplifications and short cuts to facilitate food evaluations and choice                                                                       |
| Product Category Restriction | Inductive, developed during initial coding and recoding  | Category restrictions                                                   | Restricting sustainable choice to certain product categories                                                                                            |
| <b>5 Reasons for ABG</b>     | Inductive, developed during recoding.                    | Reasons for the Attitude-Behavior Gap                                   |                                                                                                                                                         |
| Interfering Influences       | Inductive, developed during initial coding and recoding  | Influences interfere with sustainable food choice behavior              |                                                                                                                                                         |
| <i>Lack of availability</i>  | Inductive, developed during initial coding and recoding  | A lack of availability interferes with sustainable food choice behavior | A lack of availability of sustainable food products at retailers and a lack of retailers that offer sustainable food in the immediate neighborhood      |
| <i>Lack of time</i>          | Inductive, developed during initial coding and recoding  | A lack of time interferes with sustainable food choice behavior         | A lack or shortage of time hinders participants to visit a retailer that offers sustainable food products or prepare meals they perceive as sustainable |

|                                             |                                                         |                                                                                                  |                                                                                                                                                                                                                      |
|---------------------------------------------|---------------------------------------------------------|--------------------------------------------------------------------------------------------------|----------------------------------------------------------------------------------------------------------------------------------------------------------------------------------------------------------------------|
| <i>Relationship</i>                         | Inductive, developed during initial coding and recoding | Personal relationships interfere with sustainable food choice behavior                           | Conflicting preferences of family members/ peers can prevent participants to buy the sustainable product. Other family members do not attach the same importance to sustainability issues                            |
| <i>Tradition Habit</i>                      | Inductive, developed during initial coding and recoding | Personal and family member traditions and habits interfere with sustainable food choice behavior | Traditions and habits have strong behavioral influence which can hinder sustainable food choice behavior                                                                                                             |
| Competing other food values                 | Inductive, developed during initial coding and recoding | Competing food values interfere with sustainable food choice behavior                            |                                                                                                                                                                                                                      |
| <i>Div. Disadvantages</i>                   | Inductive, developed during initial coding and recoding | Disadvantage of sustainable products                                                             | Diverse disadvantages of sustainable food products compared to other food products e.g.: different appearance, a shorter shelf life, higher efforts of preparations etc. can hinder sustainable food choice behavior |
| <i>Price</i>                                | Inductive, developed during initial coding and recoding | Higher prices for sustainable products                                                           | Comparatively higher prices of sustainable products can hinder sustainable food choice behavior                                                                                                                      |
| <i>Taste</i>                                | Inductive, developed during initial coding and recoding | Taste of sustainable food products                                                               | A different /worse / not liked taste of the sustainable product can hinder sustainable food choice behavior                                                                                                          |
| Conflicting sustainability values           | Inductive, developed during initial coding and recoding | Conflicting sustainability values interfere with sustainable food choice behavior                | Sustainability values conflicting with each other e.g.: organic vs. packed, organic vs. local etc. lead to uncertainties and frustration                                                                             |
| Lack of useful information<br>Uncertainties | Inductive, developed during initial coding and recoding | A lack of useful information and uncertainties interfere with sustainable food choice behavior   | A lack of useful information and uncertainties concerning sustainability issues and sustainable food products hinders sustainable food choice                                                                        |
| <b>6. Dealing with inconsistencies</b>      | Inductive, developed during initial coding and recoding | Covers how participants deal/make sense of inconsistencies                                       |                                                                                                                                                                                                                      |



|                              |                                                         |                                           |                                                                                         |
|------------------------------|---------------------------------------------------------|-------------------------------------------|-----------------------------------------------------------------------------------------|
| Neutralization/Justification | Inductive, developed during initial coding and recoding | Covers neutralizations and justifications | Neutralization or justification of unsustainable choice                                 |
| <i>Additional effort</i>     | Inductive, developed during initial coding and recoding | Additional effort                         | Justifying unsustainable food choice with “too much additional effort”                  |
| <i>Exceptions</i>            | Inductive, developed during initial coding and recoding | Exception and Excuses                     | Justifying unsustainable food choice with that the unsustainable choice is an exception |
| Acceptance                   | Inductive, developed during initial coding and recoding | Acceptance                                | Acceptance of unsustainable behavior.                                                   |
| No Recognition               | Inductive, developed during initial coding and recoding | Not recognizing unsustainable choice      | Unsustainable choice are not recognized                                                 |
